# Supplementary material for: Mapping Research Domain Criteria using a transdiagnostic mini-RDoC assessment in mental disorders: a confirmatory factor analysis
Source: Springer Nature journal article supplement (doi:10.1007/s00406-022-01440-6), 2022-07-01
Supplement: MOESM1 [file 23229092]

**Figure S11**

*Shell model of assembled Mini-RDoC assessment*

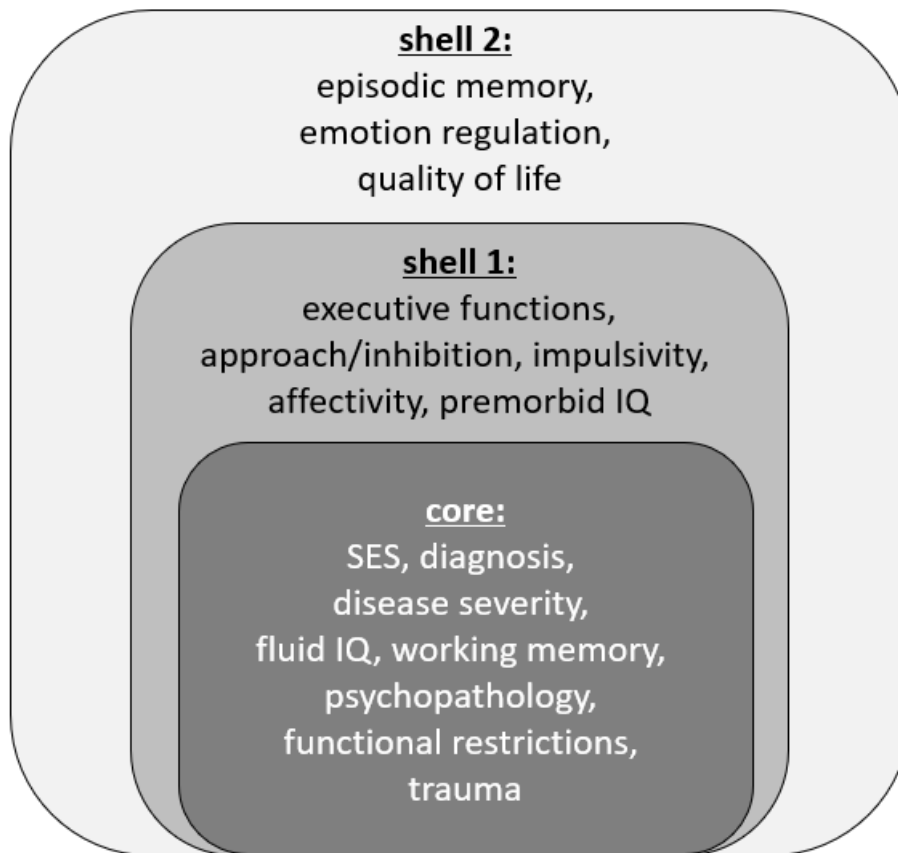

*Note.* Core had to be implemented inside the assessment process of the study; shells were optional depending on their fit to the specific assessment process of the respective study.

Heinz, Klaus Mathiak, Thomas G. Schulze, Frank Schneider, Inge Kamp-Becker, Andreas Meyer-Lindenberg, Frank Padberg, Tobias Banaschewski, Michael Bauer, Rainer Rupprecht, Hans-Ulrich Wittchen, Michael A. Rapp.  
Corresponding author: Prof. Dr. med. Dr. phil. Michael A. Rapp, Social and Preventive Medicine, University of Potsdam, Am Neuen Palais 10, 14469 Potsdam, Germany, Phone +49 331 977 4095, Fax +49 331 977 4078, [michael.rapp@uni-potsdam.de](mailto:michael.rapp@uni-potsdam.de), Orchid-ID: [0000-0003-0106-966X](https://orcid.org/0000-0003-0106-966X)
