# Supplementary material for: Mapping Research Domain Criteria using a transdiagnostic mini-RDoC assessment in mental disorders: a confirmatory factor analysis
Source: Springer Nature journal article supplement (doi:10.1007/s00406-022-01440-6), 2022-07-01
Supplement: MOESM3 [file 23229092]

**Table S13***Construction of the PD-CAN-Assessment as a shell model*

| <b>RDoC construct</b>      | <b>Units of Analysis</b> | <b>Instrument</b>                                   | <b>Abbreviation</b> |
|----------------------------|--------------------------|-----------------------------------------------------|---------------------|
| <b>Core</b>                |                          |                                                     |                     |
| SES, medication            | Anamnesis                | Standardized interview                              |                     |
| Diagnosis                  | Anamnesis                | Standardized interviews and checklists <sup>a</sup> |                     |
| Fluid intelligence         | Behavior                 | Digit Symbol Substitution Test                      | DSST                |
| Working memory             | Behavior                 | Digit span (forward)                                | DF                  |
| Psychopathology            | Self-report              | Brief Symptom Inventory                             | BSI-53              |
| Functional restriction     | Self-report              | WHO Disability Assessment Schedule 2.0              | WHO-DAS 2.0         |
| Childhood Trauma           | Self-report              | Childhood Trauma Screener                           | CTS                 |
| <b>Shell 1</b>             |                          |                                                     |                     |
| Cognitive speed processing | Behavior                 | Trail Making Test A                                 | TMT-A               |
| Executive functioning      | Behavior                 | Trail Making Test B                                 | TMT-B               |
| Approach                   | Self-report              | Behavioral Approach Scale                           | BIS/BAS             |
| Inhibition                 | Self-report              | Behavioral Inhibition Scale                         | BIS/BAS             |
| Impulsivity                | Self-report              | Barratt Impulsiveness Scale – Short Version         | BIS-15              |
| Affect                     | Self-report              | Positive and Negative Affect Schedule               | PANAS               |
| Premorbid Intelligence     | Behavior                 | Multiple-Choice Word Test – Version B               | MWT-B               |
| <b>Shell 2</b>             |                          |                                                     |                     |
| Episodic Memory            | Behavior                 | Verbal Learning and Memory Test                     | VLMT                |
| Emotion Regulation         | Self-report              | Emotion Regulation Questionnaire                    | ERQ                 |
| Quality of Life            | Self-report              | WHO- 5 Well-Being Index                             | WHO-5               |

*Note.* SES = Socioeconomic status; RDoC = Research Domain Criteria

<sup>a</sup> Standardized interviews and checklists: SCID (Structured Clinical Interview for Diagnostic and Statistical Manual of Mental Disorders [DSM-IV]), CIDI (Composite International Diagnostic Interview), IDCL (International Diagnostic Checklists for International Classification of Diseases [ICD-10]), DIPS (Diagnostic Interview for Mental Disorders) or Mini-DIPS.

Article: Mapping Research domain criteria using a transdiagnostic Mini-RDoC assessment in mental disorders – a confirmatory factor analysis

Journal: European Archives of Psychiatry and Clinical Neuroscience

Authors: Bernd R. Förstner, Mira Tschorn, Nicolas Reinoso-Schiller, Lea Mascarell Maričić, Erik Röcher, Janos L. Kalman, Sanna Stroth, Annalina V. Mayer, Kristina Schwarz, Anna Kaiser, Andrea Pfennig, André Manook, Marcus Ising, Ingmar Heinig, Andre Pittig, Andreas Heinz, Klaus Mathiak, Thomas G. Schulze, Frank Schneider, Inge Kamp-Becker, Andreas Meyer-Lindenberg, Frank Padberg, Tobias Banaschewski, Michael Bauer, Rainer Rupprecht, Hans-Ulrich Wittchen, Michael A. Rapp.

Corresponding author: Prof. Dr. med. Dr. phil. Michael A. Rapp, Social and Preventive Medicine, University of Potsdam, Am Neuen Palais 10, 14469 Potsdam, Germany, Phone +49 331 977 4095, Fax +49 331 977 4078, [michael.rapp@uni-potsdam.de](mailto:michael.rapp@uni-potsdam.de), Orchid-ID: 0000-0003-0106-966X
