# Supplementary material for: Mapping Research Domain Criteria using a transdiagnostic mini-RDoC assessment in mental disorders: a confirmatory factor analysis
Source: Springer Nature journal article supplement (doi:10.1007/s00406-022-01440-6), 2022-07-01
Supplement: MOESM4 [file 23229092]

**Table SI4***Additional changes on scales and items with descriptive statistics*

| <b>RDoC</b> | <b>Old variable</b>                                     | <b>Items</b>                                          | <b>Transformation</b>                       | <b>New variable</b>                | <b>Mean</b> | <b>SD</b> |
|-------------|---------------------------------------------------------|-------------------------------------------------------|---------------------------------------------|------------------------------------|-------------|-----------|
| PVS         | BIS/BAS subscales<br>Drive and Reward<br>Responsiveness | 3, 7, 12, 21                                          | Forming mean<br>score                       | Scale Goal<br>Attainment           | 2.90        | 0.58      |
| PVS         | PANAS subscale<br>Positive Affect                       | active,<br>interested,<br>enthusiastic,<br>determined | Item reduction<br>and forming<br>mean score | Scale Hedonic<br>Affect            | 1.78        | 0.82      |
| PVS         | BSI-53 single items<br>Obsessive-compulsive             | 15r, 26r, 27r                                         | Forming mean<br>score                       | Scale Habituation                  | 2.99        | 0.86      |
| NVS         | BIS/BAS subscale<br>Behavioral Inhibition               | 2r, 8, 22r, 24                                        | Forming mean<br>score                       | Scale Anxiety-<br>based Inhibition | 3.23        | 0.59      |

*Note.* Variables were transformed with log10 to address normal distribution issue. *SD* = Standard deviation; r = reversed; RDoC = Research Domain Criteria; PVS = Positive valence systems; NVS = Negative valence systems; BIS/BAS = Behavioral Inhibition System/Behavioral Activation System Scale; BSI-53 = Brief Symptom Checklist; PANAS = Positive and Negative Affect Scale.

Article: Mapping Research domain criteria using a transdiagnostic Mini-RDoC assessment in mental disorders – a confirmatory factor analysis

Journal: European Archives of Psychiatry and Clinical Neuroscience

Authors: Bernd R. Förstner, Mira Tschorn, Nicolas Reinoso-Schiller, Lea Mascarell Maričić, Erik Röcher, Janos L. Kalman, Sanna Stroth, Annalina V. Mayer, Kristina Schwarz, Anna Kaiser, Andrea Pfennig, André Manook, Marcus Ising, Ingmar Heinig, Andre Pittig, Andreas Heinz, Klaus Mathiak, Thomas G. Schulze, Frank Schneider, Inge Kamp-Becker, Andreas Meyer-Lindenberg, Frank Padberg, Tobias Banaschewski, Michael Bauer, Rainer Rupprecht, Hans-Ulrich Wittchen, Michael A. Rapp.

Corresponding author: Prof. Dr. med. Dr. phil. Michael A. Rapp, Social and Preventive Medicine, University of Potsdam, Am Neuen Palais 10, 14469 Potsdam, Germany, Phone +49 331 977 4095, Fax +49 331 977 4078, [michael.rapp@uni-potsdam.de](mailto:michael.rapp@uni-potsdam.de), Orchid-ID: [0000-0003-0106-966X](https://orcid.org/0000-0003-0106-966X)
