# Supplementary material for: Mapping Research Domain Criteria using a transdiagnostic mini-RDoC assessment in mental disorders: a confirmatory factor analysis
Source: Springer Nature journal article supplement (doi:10.1007/s00406-022-01440-6), 2022-07-01
Supplement: MOESM5 [file 23229092]

**Table S15***Model comparison: Fit indices and X<sup>2</sup>-test*

| Model no. | Model characteristics                                                    | CFI | TLI | RMSEA (90% CI)     | Comparison | X <sup>2</sup> (df diff), (p) |
|-----------|--------------------------------------------------------------------------|-----|-----|--------------------|------------|-------------------------------|
| 1         | 4 factor model with a priori variables (transformed if necessary)        | .77 | .75 | .078 (.076 - .081) |            |                               |
| 2         | Model 1 with 1 factor only                                               | .69 | .67 | .090 (.088 - .093) | 1 vs. 2    | (6) 1158.1 (<.001)            |
| 3         | Model 1: no covariances allowed between the factors                      | .59 | .56 | .104 (.102 - .106) | 1 vs. 3    | (6) 2571.2 (<.001)            |
| 4         | 4 factor model with reduced/changed variables (transformed if necessary) | .93 | .92 | .077 (.072 - .082) |            |                               |
| 5         | Model 4 with 1 factor only                                               | .78 | .74 | .136 (.131 - .140) | 4 vs. 5    | (6) 1656.3 (<.001)            |
| 6         | Model 4 with no covariances allowed between the factors                  | .71 | .66 | .154 (.149 - .158) | 4 vs. 6    | (6) 2327.8 (<.001)            |

Note. CFI = Comparative Fit Index; CI = Confidence Interval; df diff = degrees of freedom difference; TLI = Tucker Lewis Index; RMSEA = Root Mean Square Error of Approximation.

Article: Mapping Research domain criteria using a transdiagnostic Mini-RDoC assessment in mental disorders – a confirmatory factor analysis

Journal: European Archives of Psychiatry and Clinical Neuroscience

Authors: Bernd R. Förstner, Mira Tschorn, Nicolas Reinoso-Schiller, Lea Mascarell Maričić, Erik Röcher, Janos L. Kalman, Sanna Stroth, Annalina V. Mayer, Kristina Schwarz, Anna Kaiser, Andrea Pfennig, André Manook, Marcus Ising, Ingmar Heinig, Andre Pittig, Andreas Heinz, Klaus Mathiak, Thomas G. Schulze, Frank Schneider, Inge Kamp-Becker, Andreas Meyer-Lindenberg, Frank Padberg, Tobias Banaschewski, Michael Bauer, Rainer Rupprecht, Hans-Ulrich Wittchen, Michael A. Rapp.

Corresponding author: Prof. Dr. med. Dr. phil. Michael A. Rapp, Social and Preventive Medicine, University of Potsdam, Am Neuen Palais 10, 14469 Potsdam, Germany, Phone +49 331 977 4095, Fax +49 331 977 4078, [michael.rapp@uni-potsdam.de](mailto:michael.rapp@uni-potsdam.de), Orchid-ID: [0000-0003-0106-966X](https://orcid.org/0000-0003-0106-966X)
